# Supplementary material
Source: PubMed Central journal article supplement (PMC3476709)
Supplement: ejhg201265x10.pdf [file ejhg201265x10.pdf]

**Table 3S.** SNPs with statistically significant corrected P values for  $\chi^2$  test.

| rs id      | Chr | Map (kb)  | Gene         | Left gene    | Right gene   | F <sub>ST</sub> | $\delta$ | P       | Peak snp |
|------------|-----|-----------|--------------|--------------|--------------|-----------------|----------|---------|----------|
| rs164781   | 1   | 4565092   | -            | LOC644357    | AJAP1        | 0.112           | 0.248    | 0.00255 |          |
| rs763219   | 1   | 4573886   | -            | LOC644357    | AJAP1        | 0.123           | 0.265    | 0.00046 | *        |
| rs710128   | 1   | 10802819  | -            | CASZ1        | C1orf127     | 0.104           | 0.239    | 0.01107 | *        |
| rs1935553  | 1   | 57031073  | C1orf168     | PRKAA2       | C8A          | 0.100           | 0.216    | 0.01143 | *        |
| rs10518321 | 1   | 70088276  | LRRC7        | LOC100133218 | PIN1L        | 0.111           | 0.167    | 0.00398 | *        |
| rs2647395  | 1   | 85501252  | -            | C1orf52      | BCL10        | 0.131           | 0.277    | 0.00007 | *        |
| rs10923704 | 1   | 119294454 | TBX15        | LOC644094    | WARS2        | 0.094           | 0.152    | 0.03487 |          |
| rs12021544 | 1   | 119308755 | TBX15        | LOC644094    | WARS2        | 0.099           | 0.153    | 0.02991 |          |
| rs973500   | 1   | 119335814 | -            | TBX15        | WARS2        | 0.099           | 0.138    | 0.02755 |          |
| rs4501872  | 1   | 119353807 | -            | TBX15        | WARS2        | 0.118           | 0.153    | 0.00235 |          |
| rs4659138  | 1   | 119356156 | -            | TBX15        | WARS2        | 0.117           | 0.158    | 0.00063 | *        |
| rs10923726 | 1   | 119358674 | -            | TBX15        | WARS2        | 0.119           | 0.154    | 0.00116 |          |
| rs12021830 | 1   | 119363905 | -            | TBX15        | WARS2        | 0.119           | 0.154    | 0.00116 |          |
| rs10494218 | 1   | 119364080 | -            | TBX15        | WARS2        | 0.119           | 0.154    | 0.00116 |          |
| rs12027986 | 1   | 119372788 | -            | TBX15        | WARS2        | 0.118           | 0.155    | 0.00142 |          |
| rs12031585 | 1   | 119459461 | WARS2        | TBX15        | LOC343495    | 0.096           | 0.170    | 0.04261 |          |
| rs659580   | 1   | 168900520 | PRRX1        | SCYL1BP1     | LOC730132    | 0.098           | 0.216    | 0.02482 | *        |
| rs1476040  | 1   | 168967382 | PRRX1        | LOC730132    | C1orf129     | 0.097           | 0.221    | 0.04092 |          |
| rs6683548  | 1   | 173859693 | TNR          | LOC100132316 | LOC100128153 | 0.126           | 0.245    | 0.00086 | *        |
| rs12122003 | 1   | 186341946 | -            | LOC100129274 | LOC100131147 | 0.109           | 0.110    | 0.00603 | *        |
| rs12143302 | 1   | 186428950 | -            | LOC100129274 | LOC100131147 | 0.107           | 0.115    | 0.00757 |          |
| rs16854783 | 1   | 229893994 | DISC1        | TSX          | DISC2        | 0.100           | 0.231    | 0.03398 | *        |
| rs1400121  | 2   | 117872189 | -            | LOC100130697 | DDX18        | 0.091           | 0.140    | 0.02234 | *        |
| rs12614399 | 2   | 165858546 | SCN2A        | LOC643397    | FAM130A2     | 0.107           | 0.209    | 0.00815 | *        |
| rs7593268  | 2   | 206529639 | -            | NRP2         | INO80D       | 0.098           | 0.183    | 0.04064 | *        |
| rs13012440 | 2   | 215127167 | LOC402117    | SPAG16       | LOC100128203 | 0.101           | 0.223    | 0.02235 | *        |
| rs735360   | 3   | 180939226 | USP13        | NDUFB5       | PEX5L        | 0.097           | 0.220    | 0.04217 |          |
| rs6772052  | 3   | 180951639 | USP13        | NDUFB5       | PEX5L        | 0.099           | 0.218    | 0.02130 | *        |
| rs6821688  | 4   | 6033009   | FLJ46481     | LOC100128651 | JAKMIP1      | 0.096           | 0.164    | 0.04188 | *        |
| rs10463462 | 5   | 117226687 | -            | LOC100130968 | DTWD2        | 0.109           | 0.190    | 0.00576 | *        |
| rs4454081  | 5   | 117250084 | -            | LOC100130968 | DTWD2        | 0.089           | 0.174    | 0.04286 |          |
| rs16875501 | 6   | 85778095  | -            | TBX18        | KRT18P30     | 0.107           | 0.122    | 0.00792 | *        |
| rs10498951 | 6   | 85838814  | -            | TBX18        | KRT18P30     | 0.093           | 0.154    | 0.03745 |          |
| rs10234699 | 7   | 47178062  | -            | tcag7.940    | TNS3         | 0.105           | 0.226    | 0.00669 | *        |
| rs1379181  | 7   | 50158361  | LOC100130988 | ZPBP         | LOC100132224 | 0.096           | 0.174    | 0.04108 | *        |
| rs7825690  | 8   | 10895667  | XKR6         | PINX1        | C8orf5       | 0.102           | 0.224    | 0.01882 | *        |
| rs2444892  | 8   | 99086572  | MATN2        | RPS23P1      | RPL30        | 0.106           | 0.232    | 0.00972 | *        |
| rs1979451  | 8   | 106445772 | ZFPM2        | LOC100128132 | LOC100128685 | 0.098           | 0.154    | 0.03207 | *        |
| rs11792273 | 9   | 132743853 | ABL1         | EXOSC2       | QRFP         | 0.117           | 0.155    | 0.00142 |          |
| rs2696141  | 9   | 132743920 | ABL1         | EXOSC2       | QRFP         | 0.127           | 0.174    | 0.00029 |          |
| rs10901296 | 9   | 132755477 | -            | ABL1         | QRFP         | 0.099           | 0.151    | 0.00974 |          |
| rs11244178 | 9   | 132755829 | -            | ABL1         | QRFP         | 0.132           | 0.193    | 0.00014 | *        |
| rs7866565  | 9   | 132756366 | -            | ABL1         | QRFP         | 0.113           | 0.151    | 0.00301 |          |
| rs10787524 | 10  | 116081545 | AFAP1L2      | VWA2         | ABLIM1       | 0.103           | 0.144    | 0.01555 | *        |
| rs4964406  | 12  | 104663886 | -            | OCC-1        | FAM10A3      | 0.098           | 0.214    | 0.01316 |          |
| rs7960156  | 12  | 104667265 | -            | OCC-1        | FAM10A3      | 0.106           | 0.214    | 0.00833 | *        |
| rs10778439 | 12  | 104667456 | -            | OCC-1        | FAM10A3      | 0.106           | 0.214    | 0.00833 | *        |
| rs2888870  | 12  | 104677947 | -            | OCC-1        | FAM10A3      | 0.109           | 0.238    | 0.00591 |          |
| rs811915   | 12  | 114683689 | -            | LOC100128617 | MED13L       | 0.103           | 0.211    | 0.01387 | *        |

|            |    |          |        |              |           |       |       |         |   |
|------------|----|----------|--------|--------------|-----------|-------|-------|---------|---|
| rs533873   | 13 | 32453587 | -      | hCG_1643176  | KL        | 0.097 | 0.212 | 0.03689 |   |
| rs7984515  | 13 | 32464165 | -      | hCG_1643176  | KL        | 0.097 | 0.212 | 0.03689 |   |
| rs7984028  | 13 | 32464222 | -      | hCG_1643176  | KL        | 0.104 | 0.222 | 0.01843 |   |
| rs4941731  | 13 | 32466060 | -      | hCG_1643176  | KL        | 0.095 | 0.210 | 0.04995 |   |
| rs35205208 | 13 | 32480492 | -      | hCG_1643176  | KL        | 0.111 | 0.233 | 0.00406 | * |
| rs2274403  | 13 | 94645021 | ABCC4  | LOC100129259 | CLDN10    | 0.136 | 0.269 | 0.00007 | * |
| rs869834   | 14 | 62246897 | KCNH5  | LOC100129782 | PARP1P2   | 0.097 | 0.210 | 0.03178 |   |
| rs10133621 | 14 | 62277041 | KCNH5  | LOC100129782 | PARP1P2   | 0.113 | 0.234 | 0.00307 | * |
| rs7151907  | 14 | 62283364 | KCNH5  | LOC100129782 | PARP1P2   | 0.101 | 0.236 | 0.01856 |   |
| rs12147825 | 14 | 69859558 | -      | ADAM21P      | COX16     | 0.099 | 0.232 | 0.02813 | * |
| rs17116642 | 14 | 72045300 | RGS6   | SIPA1L1      | DPF3      | 0.115 | 0.132 | 0.00233 | * |
| rs11159695 | 14 | 84763606 | -      | LOC730105    | RNU3P3    | 0.105 | 0.238 | 0.01024 | * |
| rs7181250  | 15 | 37409885 | -      | LOC644766    | THBS1     | 0.097 | 0.223 | 0.04181 | * |
| rs2652822  | 15 | 61209825 | LACTB  | TPM1         | RPS27L    | 0.100 | 0.235 | 0.02059 | * |
| rs13335101 | 16 | 48515603 | -      | ZNF423       | TMEM188   | 0.101 | 0.231 | 0.02137 |   |
| rs2058809  | 16 | 48516224 | -      | ZNF423       | TMEM188   | 0.115 | 0.250 | 0.00199 | * |
| rs12447144 | 16 | 62564105 | -      | hCG_1642987  | LOC729217 | 0.106 | 0.233 | 0.00875 | * |
| rs8045106  | 16 | 62584649 | -      | hCG_1642987  | LOC729217 | 0.106 | 0.233 | 0.00875 | * |
| rs1052586  | 17 | 42373462 | GOSR2  | WNT9B        | RPRML     | 0.100 | 0.235 | 0.00236 | * |
| rs4133168  | 18 | 21066506 | ZNF521 | WBP2P1       | SS18      | 0.096 | 0.172 | 0.04228 | * |
| rs7281021  | 21 | 43594239 | -      | C21orf136    | FLJ41733  | 0.099 | 0.190 | 0.02716 | * |
