# Supplementary material
Source: PubMed Central journal article supplement (PMC3476709)

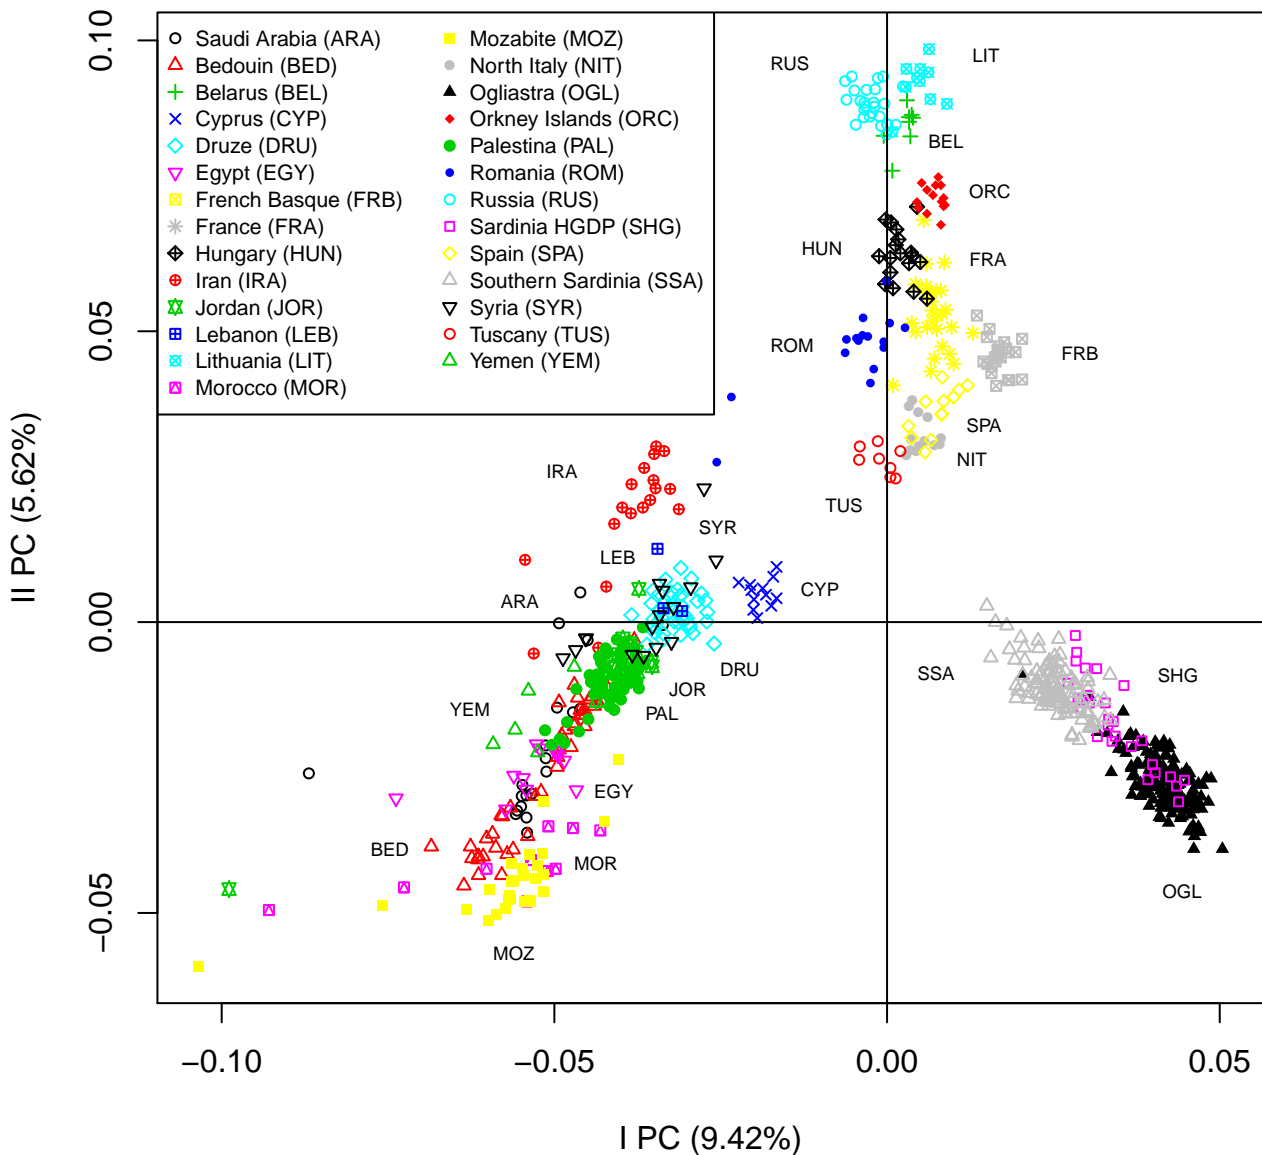

Supplement: ejhg201265x4.pdf [file ejhg201265x4.pdf]

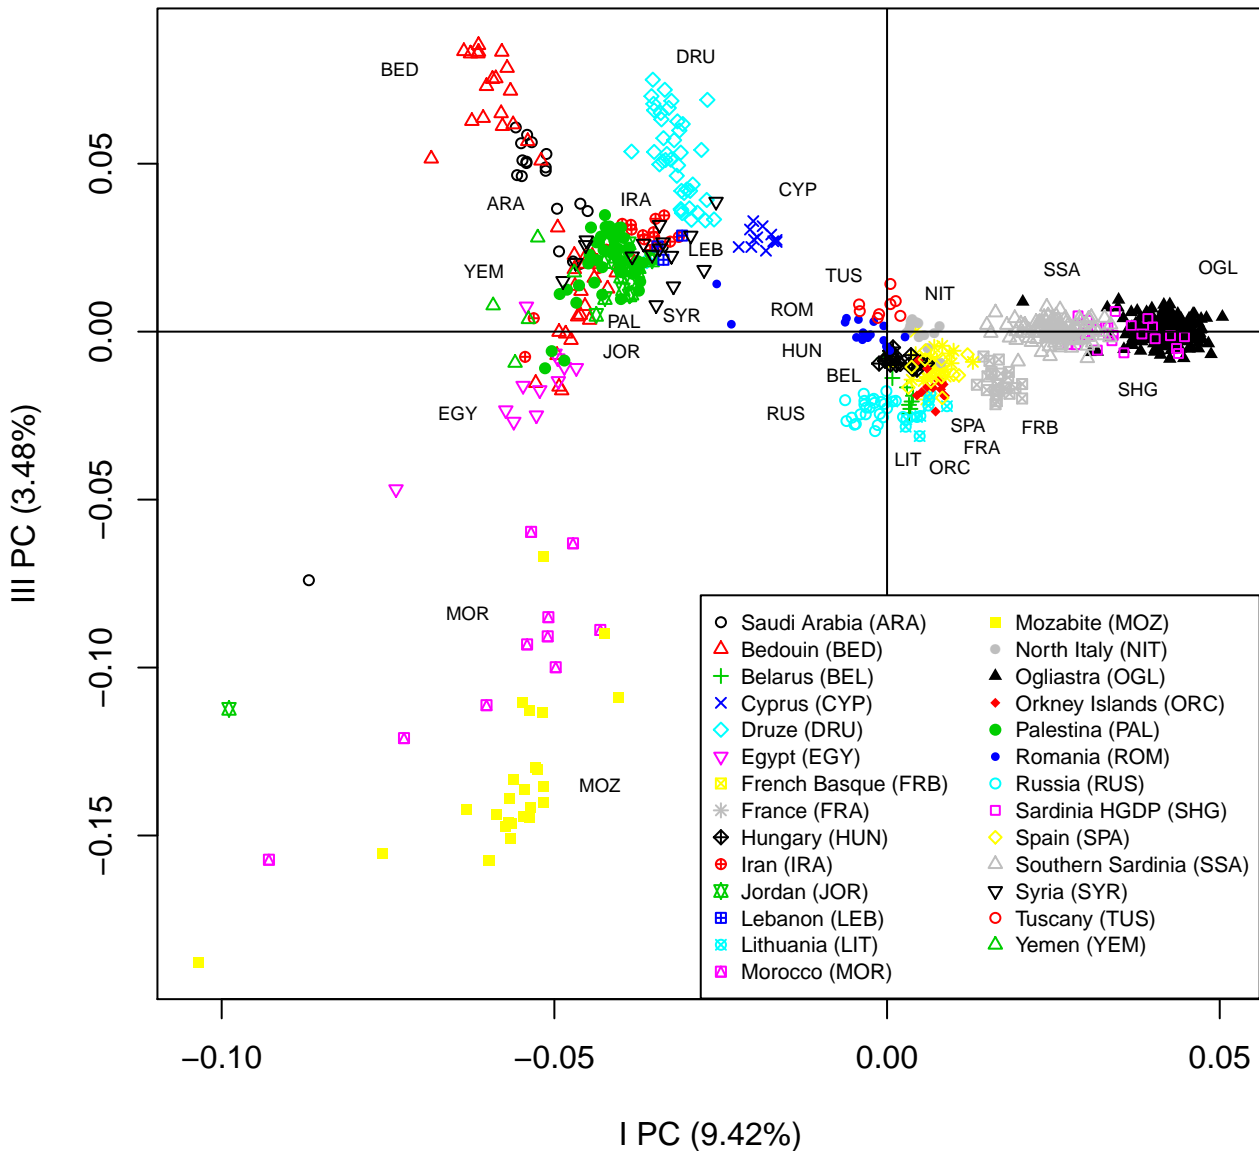

Supplement: ejhg201265x5.pdf [file ejhg201265x5.pdf]
